# Supplementary material for: Regional synthesis and mapping of soil organic carbon and nitrogen stocks at the Canadian Beaufort coast
Source: Copernicus journal article supplement (doi:10.5194/egusphere-2025-1052), 2025-03-12
Supplement: Supplementary file 1 [file egusphere-2025-1052-supplement.pdf]

Supplement for

## **Regional synthesis and mapping of soil organic carbon and nitrogen stocks at the Canadian Beaufort coast**

Wagner et al.

5 *Correspondence to:* Julia Wagner (julia.wagner@natgeo.su.se)

## whole area

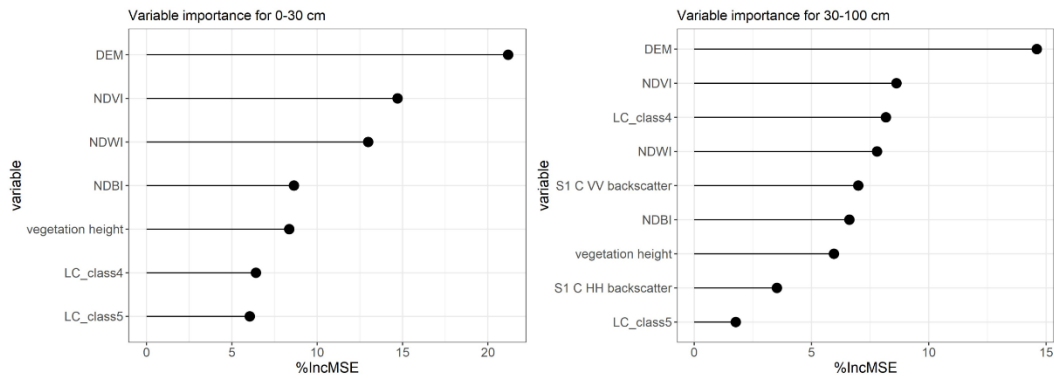

## mainland

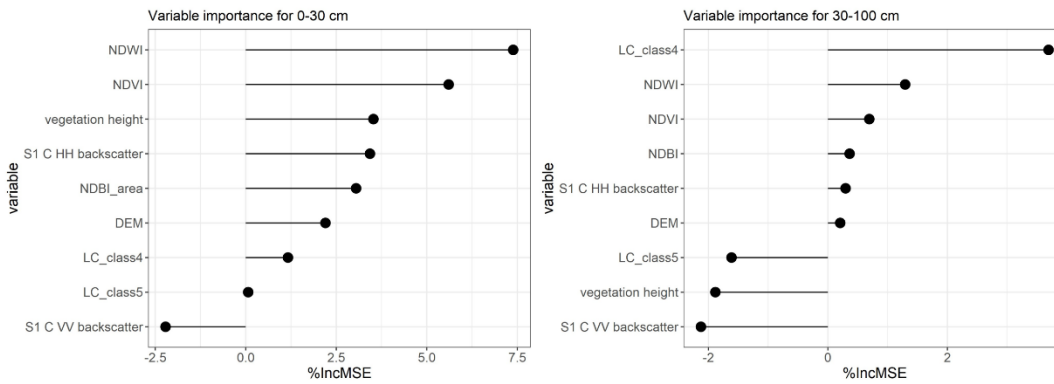

## Herschel Island

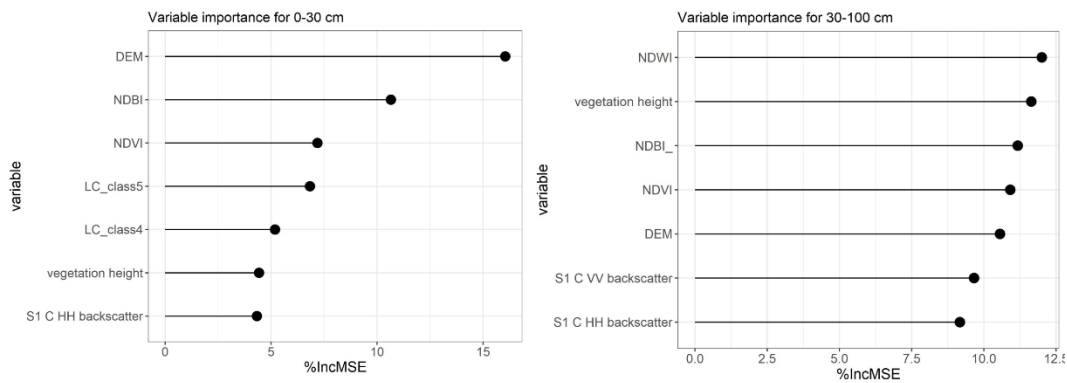

Figure S1: Variable importance plots for the different models for the SOC stocks.

## whole area

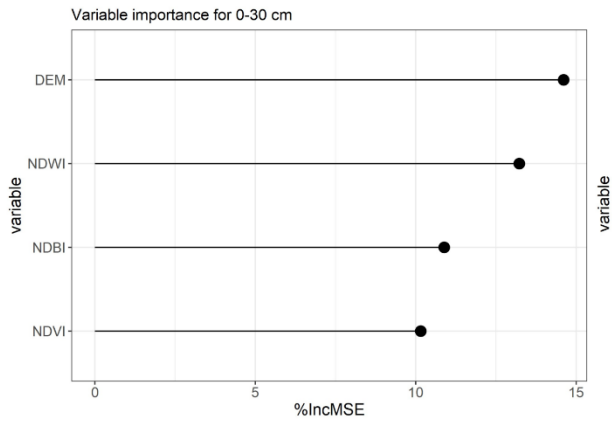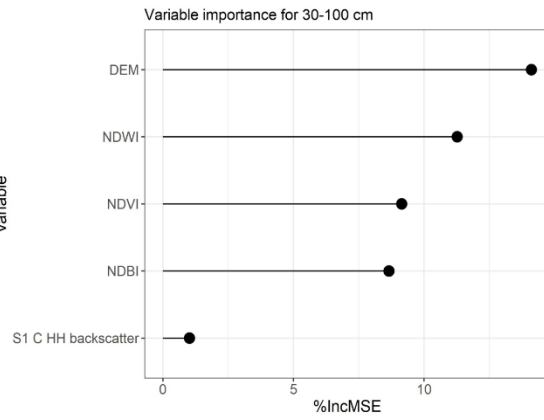

## mainland

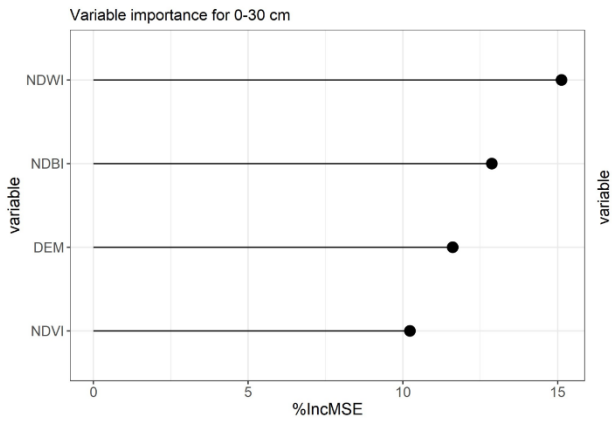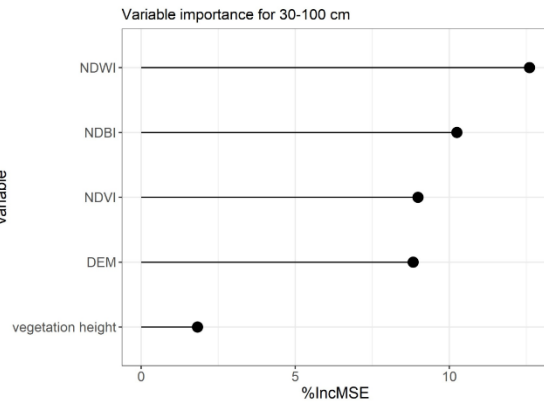

## Herschel Island

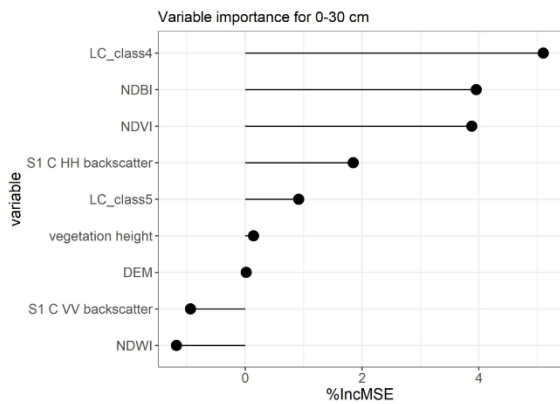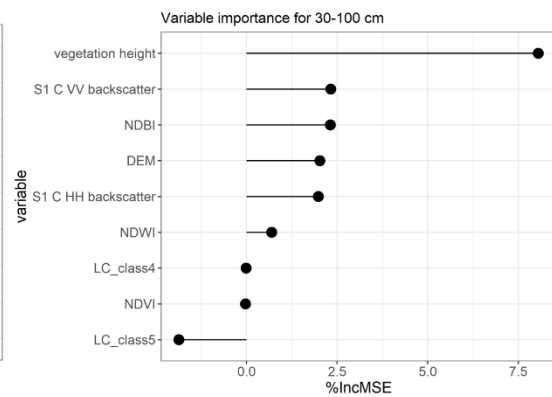

Figure S2: Variable importance plots for the different models for the N stocks.

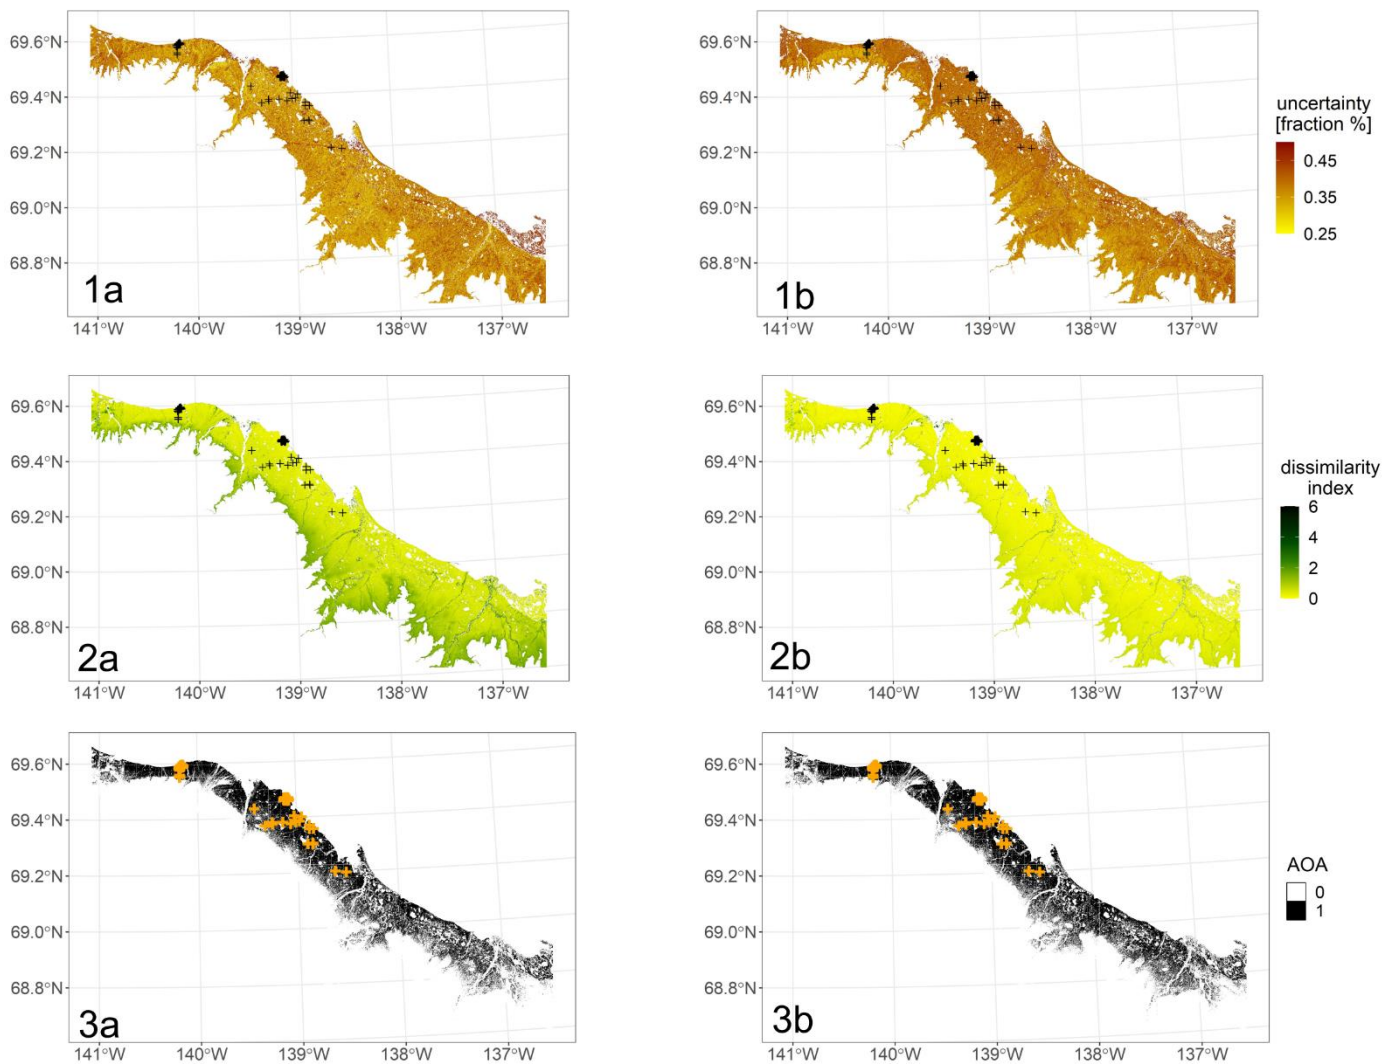

15

**Figure S3: Comparison of uncertainty, dissimilarity index and AOA for the mainland for SOC stocks at depth 0-30 (1a, 2a, 3a) and at depth 30-100 (1b, 2b, 3b).**

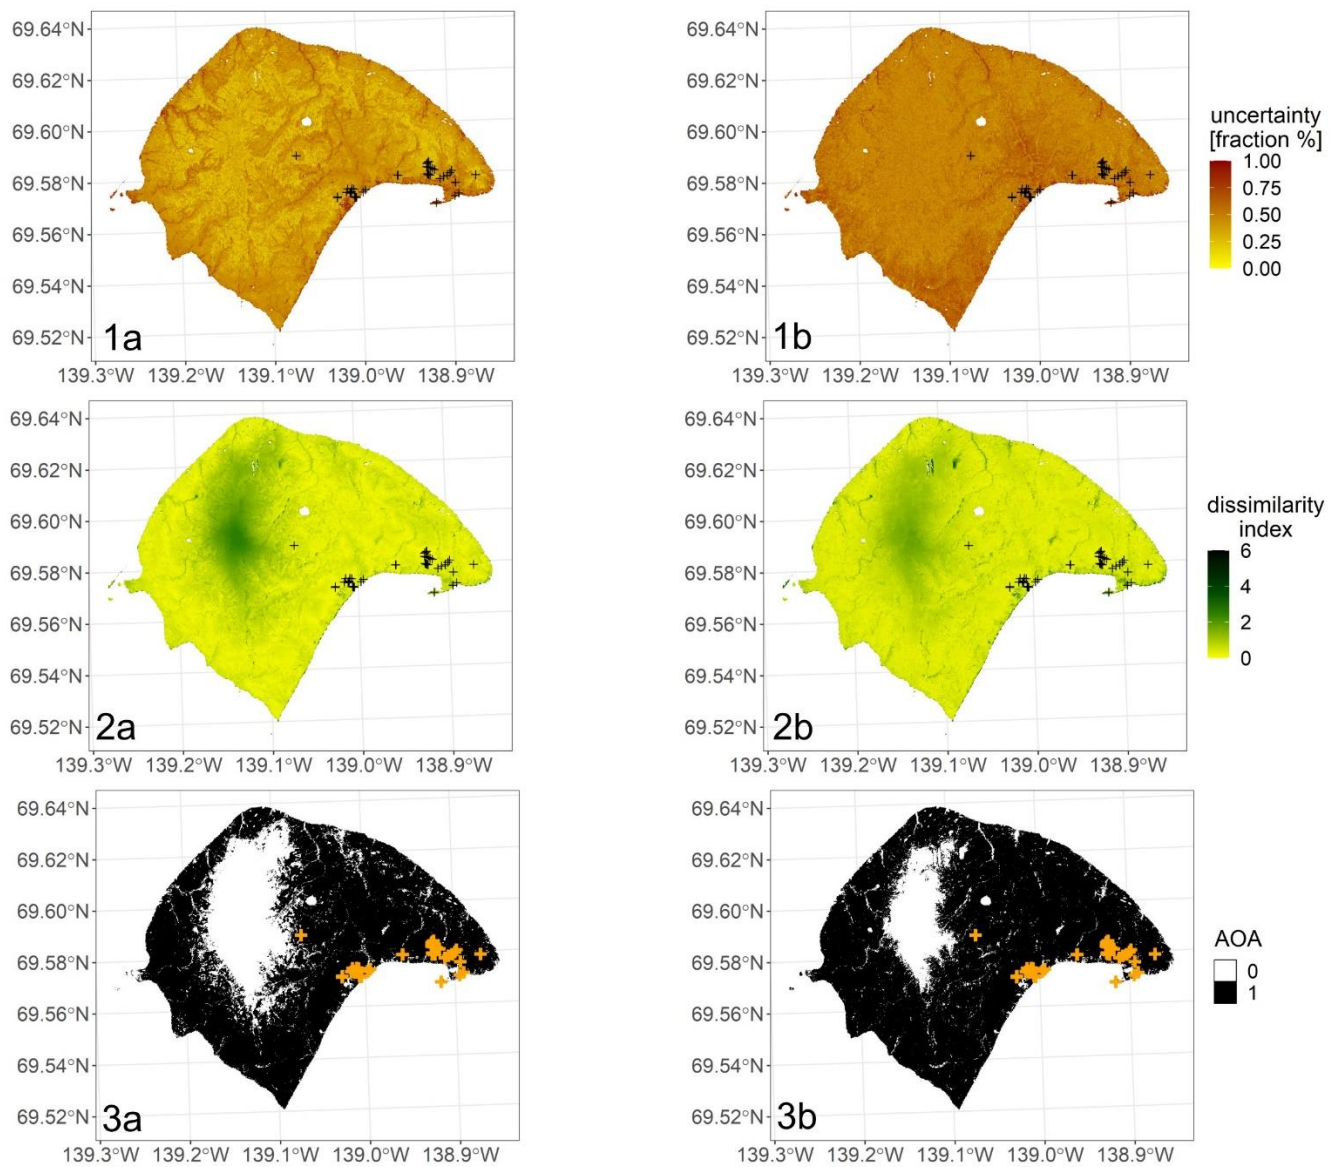

20 **Figure S4: Comparison of uncertainty, dissimilarity index and AOA for Herschel Island for SOC stocks at depth 0-30 (1a, 2a, 3a) and at depth 30-100 (1b, 2b, 3b).**

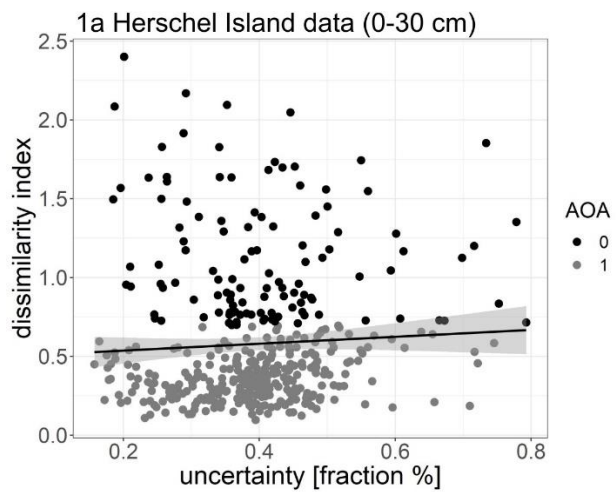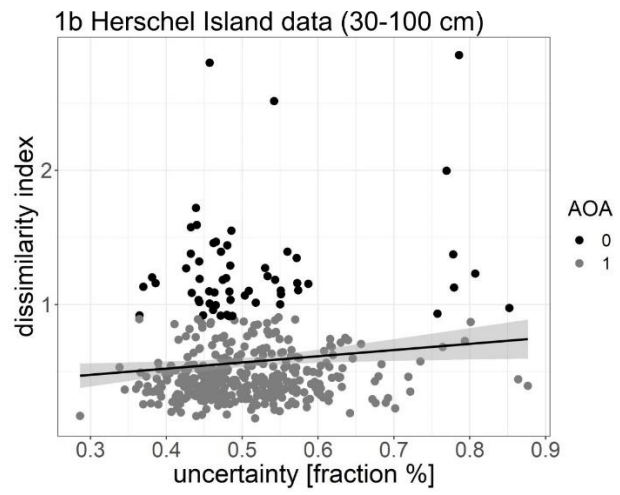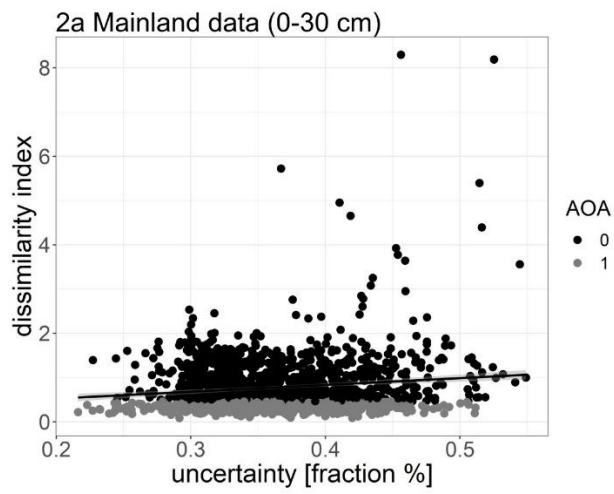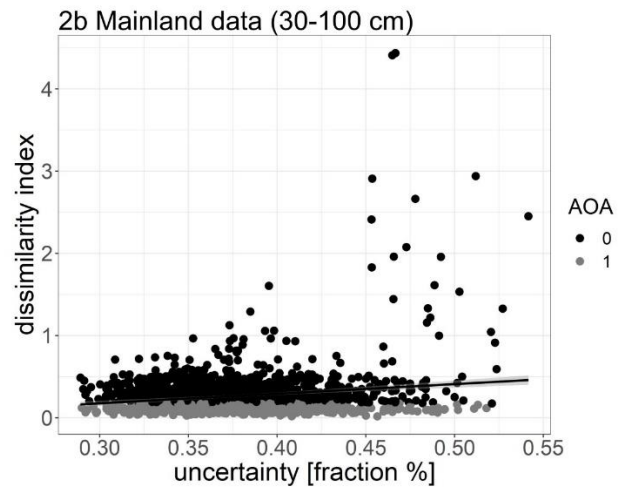

25 **Figure S5: Uncertainty versus dissimilarity index for Herschel Island (1a and 1b) and the mainland (2a and 2b). The values are sampled from the raster files at random locations throughout the study area.**

**Table S1: Dissimilarity Index (DI) thresholds chosen by the area of applicability (AOA) method.**

| model                      | AOA<br>Thresholds |
|----------------------------|-------------------|
| <i>whole area</i>          |                   |
| SOC stock<br>0-30 cm       | 0.40              |
| SOC<br>stocks<br>30-100 cm | 0.51              |
| N stocks<br>0-30 cm        | 0.35              |
| N stocks<br>30-100 cm      | 0.34              |
| <i>mainland</i>            |                   |
| SOC stock<br>0-30 cm       | 0.46              |
| SOC<br>stocks<br>30-100 cm | 0.17              |
| N stocks<br>0-30 cm        | 0.40              |
| N stocks<br>30-100 cm      | 0.44              |
| <i>Herschel Island</i>     |                   |
| SOC stock<br>0-30 cm       | 0.70              |
| SOC<br>stocks<br>30-100 cm | 0.91              |
| N stocks<br>0-30 cm        | 0.36              |
| N stocks<br>30-100 cm      | 0.59              |

**Table S2a: Comparison of average soil organic carbon (SOC) stocks for each model prediction depicting the whole area and additionally the AOA of each respective prediction and predictive model.**

35

| Prediction                                     | SOC stocks 0-30 cm    |       |        |      |      |       | SOC stocks 30-100 cm  |      |       |        |      |      |       |       |
|------------------------------------------------|-----------------------|-------|--------|------|------|-------|-----------------------|------|-------|--------|------|------|-------|-------|
|                                                | [kg/ m <sup>2</sup> ] |       |        |      |      |       | [kg/ m <sup>2</sup> ] |      |       |        |      |      |       |       |
|                                                | mean                  | StDev | median | min  | max  | PCT90 | range                 | mean | StDev | median | min  | max  | PCT90 | range |
| whole area                                     | 14.9                  | 3.0   | 14.4   | 7.8  | 37.2 | 19.1  | 29.4                  | 29.8 | 4.3   | 29.5   | 11.3 | 59.4 | 35.2  | 48.1  |
| whole area<br>only AOA                         | 16.2                  | 3.6   | 15.2   | 7.8  | 37.2 | 21.3  | 29.4                  | 30.6 | 5.1   | 30.1   | 11.3 | 59.4 | 37.4  | 48.1  |
| mainland                                       | 19.9                  | 2.8   | 19.7   | 12.8 | 38.3 | 22.9  | 25.4                  | 37.3 | 3.3   | 37.3   | 23.4 | 60.7 | 41.5  | 37.4  |
| mainland area<br>only AOA                      | 20.9                  | 2.8   | 20.5   | 12.8 | 38.3 | 23.7  | 25.4                  | 37.7 | 3.6   | 37.6   | 23.4 | 60.7 | 42.3  | 37.4  |
| Herschel Island                                | 12.2                  | 1.7   | 12.4   | 7.0  | 22.5 | 14.2  | 15.6                  | 24.0 | 4.7   | 23.4   | 9.1  | 47.6 | 31.0  | 38.6  |
| Herschel Island<br>only AOA                    | 12.2                  | 1.8   | 12.4   | 7.0  | 22.5 | 14.3  | 15.6                  | 23.8 | 4.7   | 23.1   | 9.1  | 47.6 | 30.8  | 38.6  |
| Herschel Island<br>from mainland<br>prediction | 20.5                  | 1.8   | 20.4   | 13.9 | 34.2 | 22.9  | 20.4                  | 38.1 | 4.0   | 38.6   | 24.6 | 53.6 | 42.9  | 29.0  |
| Herschel Island<br>from whole area             | 14.3                  | 1.9   | 14.3   | 7.9  | 30.6 | 16.2  | 22.7                  | 27.6 | 4.5   | 27.2   | 11.3 | 51.3 | 33.6  | 40.0  |
| mainland<br>from whole area                    | 14.9                  | 3.0   | 14.4   | 7.8  | 37.2 | 19.1  | 29.4                  | 29.9 | 4.3   | 29.5   | 14.1 | 59.4 | 35.2  | 45.3  |

40



**Table S2b: Comparison of average soil nitrogen (N) stocks for each model prediction depicting the whole area and additionally the AOA of each respective prediction and predictive model.**

| Prediction                                     | N stocks 0-30 cm      |       |        |      |      |       |       | N stocks 30-100 cm    |       |        |      |      |       |       |
|------------------------------------------------|-----------------------|-------|--------|------|------|-------|-------|-----------------------|-------|--------|------|------|-------|-------|
|                                                | [kg/ m <sup>2</sup> ] |       |        |      |      |       |       | [kg/ m <sup>2</sup> ] |       |        |      |      |       |       |
|                                                | mean                  | StDev | median | min  | max  | PCT90 | range | mean                  | StDev | median | min  | max  | PCT90 | range |
| whole area                                     | 0.90                  | 0.23  | 0.86   | 0.47 | 2.43 | 1.12  | 1.97  | 0.91                  | 0.21  | 0.87   | 0.48 | 2.49 | 1.10  | 2.00  |
| whole area<br>only AOA                         | 0.97                  | 0.27  | 0.90   | 0.47 | 2.43 | 1.28  | 1.97  | 0.98                  | 0.26  | 0.91   | 0.48 | 2.49 | 1.24  | 2.00  |
| mainland                                       | 1.08                  | 0.26  | 1.04   | 0.62 | 0.62 | 1.30  | 1.95  | 1.09                  | 0.25  | 1.05   | 0.65 | 2.61 | 1.31  | 1.95  |
| mainland area<br>only AOA                      | 1.21                  | 0.36  | 1.12   | 0.62 | 2.57 | 1.79  | 1.95  | 1.20                  | 0.33  | 1.12   | 0.65 | 2.61 | 1.51  | 1.95  |
| Herschel Island                                | 0.83                  | 0.11  | 0.85   | 0.46 | 1.20 | 0.95  | 0.74  | 1.83                  | 0.32  | 1.83   | 0.92 | 3.57 | 2.24  | 2.65  |
| Herschel Island<br>only AOA                    | 0.83                  | 0.11  | 0.86   | 0.46 | 1.20 | 0.96  | 0.74  | 1.81                  | 0.33  | 1.80   | 0.92 | 3.57 | 2.23  | 2.65  |
| Herschel Island<br>from mainland<br>prediction | 1.02                  | 0.18  | 1.02   | 0.65 | 2.50 | 1.22  | 1.85  | 1.05                  | 0.18  | 1.04   | 0.67 | 2.48 | 1.28  | 1.81  |
| Herschel Island<br>from whole<br>area          | 0.88                  | 0.13  | 0.89   | 0.47 | 2.37 | 0.99  | 1.91  | 0.88                  | 0.11  | 0.88   | 0.49 | 2.36 | 0.97  | 1.87  |
| mainland<br>from whole<br>area                 | 0.90                  | 0.23  | 0.86   | 0.47 | 2.43 | 1.12  | 1.97  | 0.91                  | 0.21  | 0.87   | 0.48 | 2.49 | 1.11  | 2.00  |

**Table S3: SOC and N stocks for 0-100 cm depth for the different models (sum of the predictions for 0-30 cm and 30-100 cm).**

| Prediction                                | SOC stocks 0-100 cm   |       | N stocks 0-100 cm     |       |
|-------------------------------------------|-----------------------|-------|-----------------------|-------|
|                                           | [kg/ m <sup>2</sup> ] |       | [kg/ m <sup>2</sup> ] |       |
|                                           | mean                  | StDev | mean                  | StDev |
| whole area                                | 44.7                  | 6.5   | 1.81                  | 0.44  |
| mainland                                  | 57.2                  | 4.50  | 2.17                  | 0.50  |
| Herschel Island                           | 36.2                  | 5.70  | 2.66                  | 0.39  |
| sum of<br>mainland and<br>Herschel Island | 56.7                  | 5.6   | 2.19                  | 0.51  |
